# Supplementary material for: Temporal trends in initiation of VKA, rivaroxaban, apixaban and dabigatran for the treatment of venous thromboembolism - A Danish nationwide cohort study
Source: PubMed Central journal article supplement (PMC5469820; doi:10.1038/s41598-017-03596-x), 2017-06-13
Supplement: 41598_2017_3596_MOESM1_ESM.pdf [file 41598_2017_3596_MOESM1_ESM.pdf]

## **Temporal trends in initiation of VKA, rivaroxaban, apixaban and dabigatran for the treatment of venous thromboembolism - A Danish nationwide cohort study**

**Authors:** Caroline Sindet-Pedersen M.Sc.\* (1,2,3), Jannik Langtved Pallisgaard MD (1,2), Laila Staerk MD (1,2), Jeffrey S. Berger MD, MS (3), Morten Lamberts (1,4) Christian Torp-Pedersen MD, DMSc (1, 5), Gunnar H. Gislason MD, PhD (1,2,6, 7) Jonas Bjerring Olesen MD, PhD (1).

### **Affiliation**

- 1) Department of Cardiology, Copenhagen University Hospital Herlev and Gentofte, 2900 Hellerup, Denmark.
- 2) Faculty of Health and Medical Sciences, University of Copenhagen, 2200 Copenhagen N, Denmark.
- 3) New York University School of Medicine, New York, New York, USA
- 4) Department of Cardiology, Copenhagen University Hospital Rigshospitalet, 2100 Copenhagen Ø, Denmark.
- 5) Department of Health, Science and Technology, Aalborg University, and Department of Epidemiology/Biostatistics and Cardiology, Aalborg University Hospital, Aalborg, Denmark.
- 6) The National Institute of Public Health, University of Southern Denmark, 1353 Odense, Denmark.
- 7) The Danish Heart Foundation, 1127 Copenhagen K, Copenhagen, Denmark.

\* **Email for corresponding author:** carolinesindet@gmail.com

## Supplementary

**Table 1:** List of ICD-10 diagnoses codes and ATC codes

| <b>Population</b>                                                         |                                                                                                                                                                                                                                                    |                                                                                                                                                                                                                                          |
|---------------------------------------------------------------------------|----------------------------------------------------------------------------------------------------------------------------------------------------------------------------------------------------------------------------------------------------|------------------------------------------------------------------------------------------------------------------------------------------------------------------------------------------------------------------------------------------|
| <b>Venous thromboembolism</b>                                             |                                                                                                                                                                                                                                                    |                                                                                                                                                                                                                                          |
| <i>(Secondary and primary diagnoses codes, inpatient and outpatients)</i> |                                                                                                                                                                                                                                                    |                                                                                                                                                                                                                                          |
| <i>Pulmonary embolism</i>                                                 | <i>Defined from diagnosis</i>                                                                                                                                                                                                                      | ICD-10: DI26                                                                                                                                                                                                                             |
| <i>Deep venous thrombosis</i>                                             | <i>Defined from diagnosis</i>                                                                                                                                                                                                                      | ICD10: I801-I803, I808, I809, I821-I823, I828, I829                                                                                                                                                                                      |
| <i>Rivaroxaban</i>                                                        | <i>Defined from ATC</i>                                                                                                                                                                                                                            | B01AF01                                                                                                                                                                                                                                  |
| <i>Dabigatran</i>                                                         | <i>Defined from ATC</i>                                                                                                                                                                                                                            | B01AE07                                                                                                                                                                                                                                  |
| <i>Apixaban</i>                                                           | <i>Defined from ATC</i>                                                                                                                                                                                                                            | B01AF02                                                                                                                                                                                                                                  |
| <i>Vitamin K antagonists</i>                                              | <i>Defined from ATC</i>                                                                                                                                                                                                                            | B01AA03<br>B01AA04                                                                                                                                                                                                                       |
| <b>Comorbidities</b>                                                      |                                                                                                                                                                                                                                                    |                                                                                                                                                                                                                                          |
| <i>(Secondary and primary diagnoses codes, inpatient and outpatients)</i> |                                                                                                                                                                                                                                                    |                                                                                                                                                                                                                                          |
| <i>Ischemic heart disease</i>                                             | <i>Defined from diagnosis</i>                                                                                                                                                                                                                      | ICD-10: DI20-25                                                                                                                                                                                                                          |
| <i>Peripheral artery disease</i>                                          | <i>Defined from diagnosis</i>                                                                                                                                                                                                                      | ICD-10: DI70                                                                                                                                                                                                                             |
| <i>Acute myocardial infarction</i>                                        | <i>Defined from diagnosis</i>                                                                                                                                                                                                                      | ICD-10: DI21, DI22                                                                                                                                                                                                                       |
| <i>Stroke</i>                                                             | <i>Defined from diagnosis</i>                                                                                                                                                                                                                      | ICD-10: DI63, DI64                                                                                                                                                                                                                       |
| <i>Atrial fibrillation</i>                                                | <i>Defined from diagnosis</i>                                                                                                                                                                                                                      | ICD-10: DI48                                                                                                                                                                                                                             |
| <i>Cancer</i>                                                             | <i>Defined from diagnosis</i>                                                                                                                                                                                                                      | ICD-10: DC                                                                                                                                                                                                                               |
| <i>Chronic kidney disease</i>                                             | <i>Defined from diagnosis</i>                                                                                                                                                                                                                      | ICD-10: DE102, DE112, DE132, DE142, DI120, DN02, DN03, DNO4, DN05, DN06, DN07, DN08, DN11, DN12, DN14, DN158, DN159, DN160, DN162, DNI63, DN164, DN168, DN18, DN19, DN26, DQ61, DM300, DM313, DM319, DM321B                              |
| <i>Hypertension</i>                                                       | <i>Defined from combination treatment with at least two classes of antihypertensive drugs: adrenergic <math>\alpha</math>-antagonists, non-loop diuretics, vasodilators, beta-blockers, calcium channel blockers and renin-angiotension system</i> | ATC: C02A, C02B, C02C, C02L, C03A, C03B, C03D, C03E, C03X, C07B, C07C, C07D, C08G, C02DA, C09BA, C09DA, C02DB, C02DD, C02DG, C07A, C07B, C07C, C07D, C07F, C08, C09BB, C09DB, C09AA, C09BA, C09BB, C09CA, C09DA, C09DB, C09XA02, C09XA52 |
| <i>Liver disease</i>                                                      | <i>Defined from diagnosis</i>                                                                                                                                                                                                                      | DB15, DB16, DB17, DB18, DB19, DC22, DD684C, DK70, DK71, DK72, DK73, DK74, DK75, DK76, DK77, DZ944, DQ618A                                                                                                                                |

|                                                      |                                                       |                                                             |
|------------------------------------------------------|-------------------------------------------------------|-------------------------------------------------------------|
| <i>Chronic obstructive pulmonary disease</i>         | <i>Defined from diagnosis</i>                         | ICD-10: DJ42, DJ43, DJ44                                    |
| <i>Chronic heart failure</i>                         | <i>Defined from diagnosis</i>                         | ICD-10: DI110, DI42, DI50, DJ81                             |
| <i>Thrombophilia</i>                                 | <i>Defined from diagnosis</i>                         | ICD-10: DD685, DD686                                        |
| Diabetes mellitus                                    | Diabetes mellitus Defined from glucose lowering drugs | ATC: A10                                                    |
| Mechanical heart valves or rheumatic mitral stenosis | <i>Defined from diagnosis and procedure codes</i>     | ICD-10: DI050, DI060<br>NSCP: KFKD00, KFMD00, KFG00, KFJF00 |
| <i>Alloplastic surgery</i>                           | Defined from procedures                               | NSCP: KNFB, KNFC, KNGB, KNGC                                |

**Table 2:** list of ATC-codes

|                                                                       |                                                                      |                                                                                    |
|-----------------------------------------------------------------------|----------------------------------------------------------------------|------------------------------------------------------------------------------------|
| <i>ADP-receptor blockers</i>                                          | Defined from ATC-codes                                               | B01AC except B01AC06/ B01AC56                                                      |
| <i>Aspirin</i>                                                        | Defined from treatment with acetylsalicylic acid                     | B01AC06, N02BA01, B01AC56                                                          |
| <i>Ulcer medication</i>                                               | Defined from ATC-codes                                               | A02                                                                                |
| <i>Lipid modifying drugs</i>                                          | Defined from ATC-codes                                               | C10                                                                                |
| <i>Non steroidal anti-inflammatory drugs</i>                          | Defined from ATC-codes                                               | M01A                                                                               |
| <i>Contraceptives</i>                                                 | Defined from treatment with hormonal contraceptives for systemic use | G03A                                                                               |
| <i>Hormone replacement therapy</i>                                    | Defined from treatment with estrogens, progestogens, androgens       | G03C, G03D, G03E, G03F                                                             |
| <i>Diuretics</i>                                                      | Defined from ATC-codes                                               | C02L, C03A, C03B, C03D, C03E, C03X, C07C, C07D, C08G, C02DA, C09BA, C09DA, C09xa52 |
| <i>Loop</i>                                                           | Defined from ATC-codes                                               | C03C                                                                               |
| <i>Diuretics+ other antihypertensive drugs</i>                        | Defined from ATC-codes                                               | C02L                                                                               |
| <i>Beta- blocking agents</i>                                          | Defined from ATC-codes                                               | C07A                                                                               |
| <i>Beta blocking agents combined with diuretics</i>                   | Defined from ATC-codes                                               | C07B , C07C, C07D                                                                  |
| <i>Beta blocking agents combined with calcium channel antagonists</i> | Defined from ATC-codes                                               | C07F                                                                               |
| <i>Calcium channel antagonists</i>                                    | Defined from ATC-codes                                               | C08                                                                                |
| <i>Calcium channel antagonists and diuretics</i>                      | Defined from ATC-codes                                               | C08G                                                                               |
| <i>Renin angiotensin system</i>                                       | Defined from ATC-codes                                               | C09XA02                                                                            |

---

*inhibitors*

---

|                                                            |                        |              |
|------------------------------------------------------------|------------------------|--------------|
| <i>Renin angiotensin system<br/>inhibitors + diuretics</i> | Defined from ATC-codes | C09BA, C09DA |
|------------------------------------------------------------|------------------------|--------------|

---

|                                                                               |                        |              |
|-------------------------------------------------------------------------------|------------------------|--------------|
| <i>Renin angiotensin system<br/>inhibitors + calcium<br/>channel blockers</i> | Defined from ATC-codes | C09BB, C09DB |
|-------------------------------------------------------------------------------|------------------------|--------------|

---

**Table 3:** Factors associated with initiation of rivaroxaban, apixaban, or dabigatran, vs. VKA in patients with deep venous thromboembolism. Odds ratio below 1 indicates in favor of VKA and above 1 in favor of rivaroxaban, apixaban or dabigatran

|                               | Odds ratios         |                   |                    |
|-------------------------------|---------------------|-------------------|--------------------|
|                               | Rivaroxaban vs. VKA | Apixaban vs. VKA  | Dabigatran vs. VKA |
| <b>Sex</b>                    |                     |                   |                    |
| Female                        | Ref                 | Ref               | Ref                |
| Male                          | 1.02 (0.93-1.11)    | 1.11 (0.89-1.39)  | 0.92 (0.52-1.65)   |
| <b>Age groups</b>             |                     |                   |                    |
| <65                           | Ref                 | Ref               | Ref                |
| 65-75                         | 0.96 (0.86-1.07)    | 0.96 (0.86-1.07)  | 1.25 (0.58-2.58)   |
| >75                           | 1.00 (0.90-1.23)    | 1.00 (0.90-1.23)  | 1.66 (0.81-3.35)   |
| <b>Index event</b>            |                     |                   |                    |
| Deep venous thrombosis        | NA                  | NA                | NA                 |
| Pulmonary embolism            | NA                  | NA                | NA                 |
| <b>Comorbidities</b>          |                     |                   |                    |
| Previous VTE                  | 0.73 (0.64-0.82)*   | 0.71 (0.50-0.99)* | 0.54 (0.18-1.26)   |
| Previous bleeding             | 1.14 (0.97-1.24)    | 0.95 (0.63-1.40)  | 1.18 (0.43-2.73)   |
| Alloplastic surgery           | 1.02 (0.75-1.40)    | 0.88 (0.35-1.96)  | 1.88 (0.29-6.61)   |
| Chronic kidney disease        | 0.42 (0.32-0.54)*   | 0.63 (0.35-1.07)  | NA                 |
| Liver disease                 | 0.83 (0.60-1.48)    | 1.07 (0.48-2.19)  | NA                 |
| Heart failure                 | 1.50 (1.14-1.96)*   | 0.92 (0.46-1.76)  | 0.79 (0.04-4.36)   |
| Ischemic heart disease        | 0.94 (0.77-1.14)    | 1.55 (0.98-2.39)  | 0.54 (0.08-1.92)   |
| Vascular disease              | 0.89 (0.64-1.21)    | 1.17 (0.55-2.30)  | 1.83 (0.29-6.40)   |
| Hypertension                  | 0.86 (0.77-0.96)*   | 0.85 (0.63-1.22)  | 0.50 (0.19-1.07)   |
| Acute myocardial infarction   | 0.73 (0.47-1.50)    | 0.49 (0.18-1.38)  | NA                 |
| Cancer                        | 0.71 (0.61-0.82)*   | 0.70 (0.49-0.99)* | 0.77 (0.29-1.74)   |
| Diabetes                      | 1.16 (0.98-1.38)    | 1.33 (0.87-1.98)  | 0.95 (0.22-2.74)   |
| Stroke                        | 0.75 (0.62-0.91)*   | 1.04 (0.66-1.58)  | 1.54 (0.51-3.74)   |
| COPD                          | 0.78 (0.65-0.94)*   | 0.91 (0.57-1.41)  | 2.71 (0.85-4.84)   |
| Thrombophilia                 | 0.61 (0.43-0.86)*   | 0.17 (0.03-0.60)* | NA                 |
| Year (with 1 year increments) | 2.28 (2.20-2.36)*   | 5.24 (4.62-5.98)  | 2.71 (2.12-3.53)   |

**Table 4:** Factors associated with initiation of rivaroxaban, apixaban, or dabigatran, vs. VKA in patients with pulmonary embolism Odds ratio below 1 indicates in favor of VKA and above 1 in favor of rivaroxaban, apixaban or dabigatran

| Variables                     | Odds ratios         |                   |                    |
|-------------------------------|---------------------|-------------------|--------------------|
|                               | Rivaroxaban vs. VKA | Apixaban vs. VKA  | Dabigatran vs. VKA |
| <b>Sex</b>                    |                     |                   |                    |
| Male                          | Ref                 | Ref               | Ref                |
| Female                        | 1.09 (0.98-1.22)    | 0.97 (0.80-1.20)  | 0.88 (0.48-1.62)   |
| <b>Age groups</b>             |                     |                   |                    |
| <65                           | Ref                 | Ref               | Ref                |
| 65-75                         | 1.06 (0.93-1.22)    | 1.63 (1.26-2.11)  | 1.63 (0.75-3.53)   |
| >75                           | 1.02 (0.89-1.17)    | 1.06 (0.80-1.40)  | 1.64 (0.77-3.55)   |
| <b>Index event</b>            |                     |                   |                    |
| Deep venous thrombosis        | NA                  | NA                | NA                 |
| Pulmonary embolism            | NA                  | NA                | NA                 |
| <b>Comorbidities</b>          |                     |                   |                    |
| Previous VTE                  | 0.87 (0.74-1.02)    | 0.75 (0.52-1.05)  | 0.87 (0.29-2.11)   |
| Previous bleeding             | 0.87 (0.74-1.03)    | 0.92 (0.67-1.25)  | 0.87 (0.15-1.40)   |
| Alloplastic surgery           | 1.51 (1.06-2.16)    | 1.13 (0.56-2-15)  | NA                 |
| Chronic kidney disease        | 0.41 (0.31-0.54)    | 0.37 (0.21-0.62)* | NA                 |
| Liver disease                 | 0.61 (0.39-0.93)    | 0.85 (0.39-1-72)  | NA                 |
| Heart failure                 | 1.12 (0.90-1.40)    | 0.75 (0.47-1.17)  | 1.10 (0.24-3.51)   |
| Ischemic heart disease        | 0.81 (0.67-0.98)    | 1.04 (0.73-1.47)  | 0.42 (0.06-1.47)   |
| Vascular disease              | 0.93 (0.65-1.32)    | 0.43 (0.17-0.97)* | 1.00 (0.05-5.06)   |
| Hypertension                  | 0.93 (0.82-1.05)    | 0.99 (0.78-1.25)  | 0.47 (0.21-1.00)   |
| Acute myocardial infarction   | 0.93 (0.60-1.46)    | 3.24 (1.27-9.17)* | 2.06 (0.15-5.75)   |
| Cancer                        | 0.78 (0.67-0.90)    | 0.79 (0.59-1.04)  | 1.08 (0.48-2.22)   |
| Diabetes                      | 0.83 (0.68-1.02)    | 0.76 (0.51-1.10)  | 0.94 (0.27-2.49)   |
| Stroke                        | 1.00 (0.82-1.24)    | 1.32 (0.91-1.90)  | 1.05 (0.25-3.03)   |
| COPD                          | 0.96 (0.82-1.12)    | 1.16 (0.86-1.53)  | 1.48 (0.65-3.05)   |
| Thrombophilia                 | 0.51 (0.26-0.94)    | 0.50 (0.08-1.88)  | NA                 |
| Year (with 1 year increments) | 2.12 (2.03-2.22)    | 4.01 (3.60-4.49)  | 2.79 (2.14-3.75)   |

**Table 5:** Factors associated with initiation of NOACs vs. VKA in patients with venous thromboembolism, Deep venous thromboembolism or pulmonary embolism

|                               | NOAC vs VKA in patients with VTE | NOAC vs VKA in patients with DVT | NOAC vs VKA in patients with PE |
|-------------------------------|----------------------------------|----------------------------------|---------------------------------|
| <b>Sex</b>                    |                                  |                                  |                                 |
| Female                        | Ref                              |                                  |                                 |
| Male                          | 1.05 (0.98-1.12)                 | 1.02 (0.93-1.11)                 | 1.07 (0.97-1.19)                |
| <b>Age groups</b>             |                                  |                                  |                                 |
| <65                           | Ref                              |                                  |                                 |
| 65-75                         | 1.01 (0.92-1.10)                 | 1.01 (0.90-1.13)                 | 1.07 (0.94-1.24)                |
| >75                           | 1.00 (0.92-1.09)                 | 0.97 (0.89-1.01)                 | 1.09 (0.95-1.22)                |
| <b>Index event</b>            |                                  |                                  |                                 |
| Deep venous thrombosis        | Ref                              | NA                               | NA                              |
| Pulmonary embolism            | 1.10 (1.03-1.18)*                | NA                               | NA                              |
| <b>Comorbidities</b>          |                                  |                                  |                                 |
| Previous VTE                  | 0.78 (0.71-0.85)*                | 0.73 (0.64-0.82)*                | 0.86 (0.74-1.00)                |
| Previous bleeding             | 1.00 (0.90-1.12)                 | 1.14 (0.98-1.33)                 | 0.87 (0.74-1.02)                |
| Alloplastic surgery           | 1.22 (0.97-1.53)                 | 1.03 (0.76-1.40)                 | 1.48 (1.05-2.10)*               |
| Chronic kidney disease        | 0.42 (0.35-0.51)*                | 0.44 (0.34-0.56)*                | 0.41 (0.31-0.53)*               |
| Liver disease                 | 0.75 (0.59-0.97)*                | 0.84 (0.61-1.15)                 | 0.65 (0.43-0.97)*               |
| Heart failure                 | 1.22 (1.03-1.44)*                | 1.45 (1.11-1.89)*                | 1.08 (0.87-1.34)                |
| Ischemic heart disease        | 0.90 (0.78-1.02)                 | 0.98 (0.81-1.19)                 | 0.84 (0.70-1.01)                |
| Vascular disease              | 0.88 (0.70-1.11)                 | 0.93 (0.68-1.26)                 | 0.85 (0.60-1.20)                |
| Hypertension                  | 0.89 (0.82-0.97)*                | 0.85 (0.76-0.95)*                | 0.93 (0.83-1.05)                |
| Acute myocardial infarction   | 0.91 (0.67-1.23)                 | 0.69 (0.45-1.07)                 | 1.11 (0.72-1.72)                |
| Cancer                        | 0.75 (0.68-0.82)*                | 0.71 (0.62-0.81)*                | 0.78 (0.67-0.90)                |
| Diabetes                      | 1.01 (0.89-1.14)                 | 1.17 (0.99-1.40)                 | 0.89 (0.69-1.12)                |
| Stroke                        | 0.90 (0.78-1.03)                 | 0.78 (0.65-0.94)*                | 1.05 (0.86-1.24)                |
| COPD                          | 0.91 (0.81-1.03)                 | 0.82 (0.68-0.98)*                | 0.99 (0.85-1.15)                |
| Thrombophilia                 | 0.56 (0.41-0.75)*                | 0.58 (0.41-0.81)*                | 0.50 (0.26-0.95)*               |
| Year (with 1 year increments) | 2.37 (2.31-2.44)*                | 2.41 (2.32-2.50)*                | 2.33 (2.23-2.44)*               |

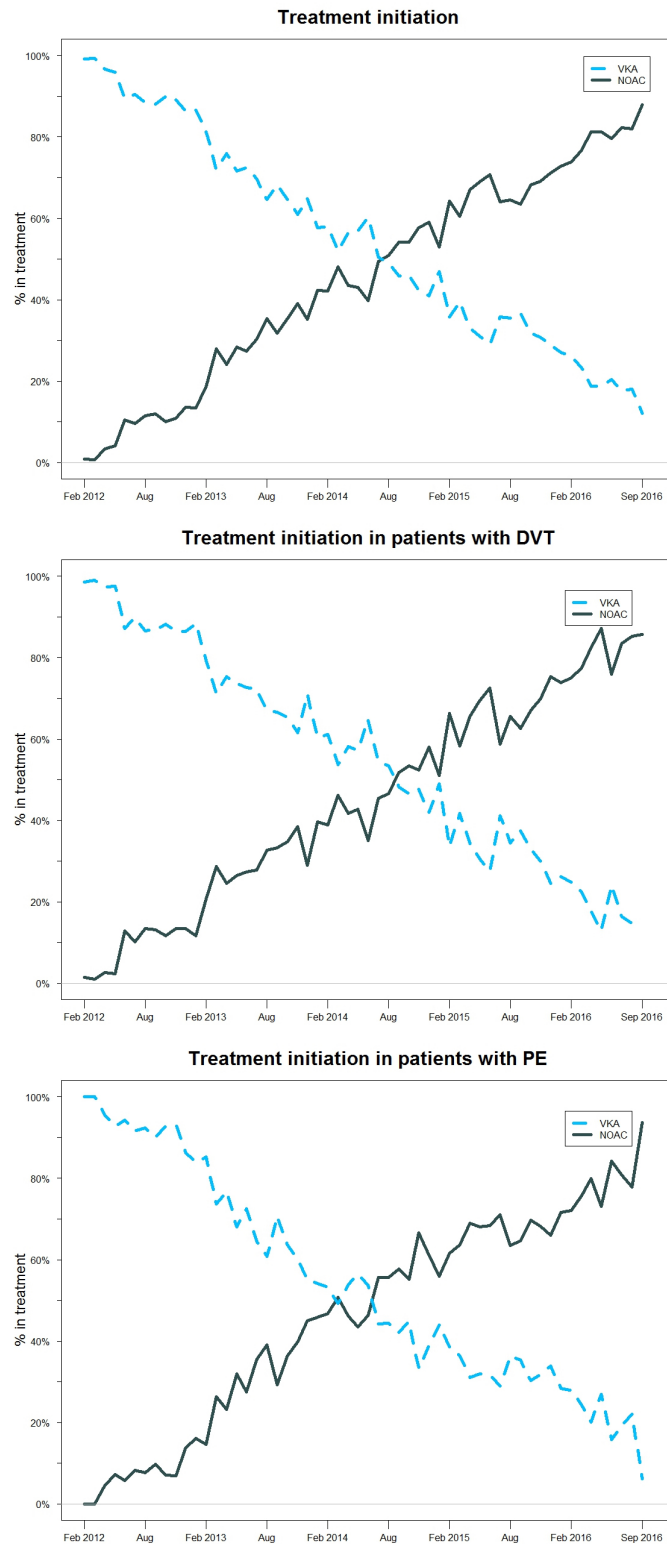

**Figure 1:** Graph of temporal trend over initiation of oral anticoagulation therapy in patients with venous thromboembolism (VTE). Percentage per month of patients with VTE, pulmonary embolism (PE) or deep venous thromboembolism (DVT) initiating VKA or NOAC, between February 2012 and September 2016. VKA: p- value for decreasing trend < 0.001, NOAC: p-value for increasing trend < 0.001.
